# Supplementary material
Source: Springer Nature journal article supplement (https://www.springermedizin.de/resource/supplementary/12935_2010_248_MOESM3_ESM.pdf/9540142)

**A**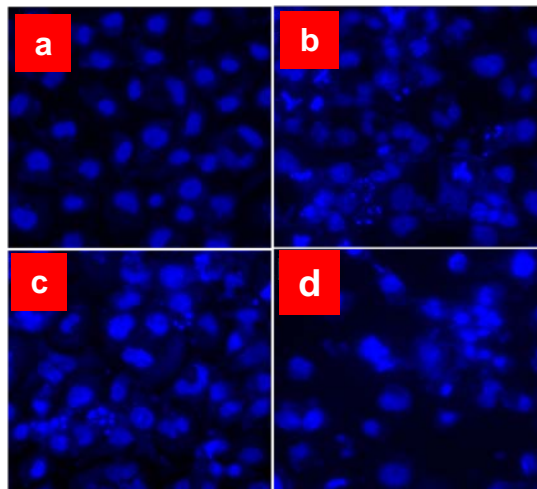**B**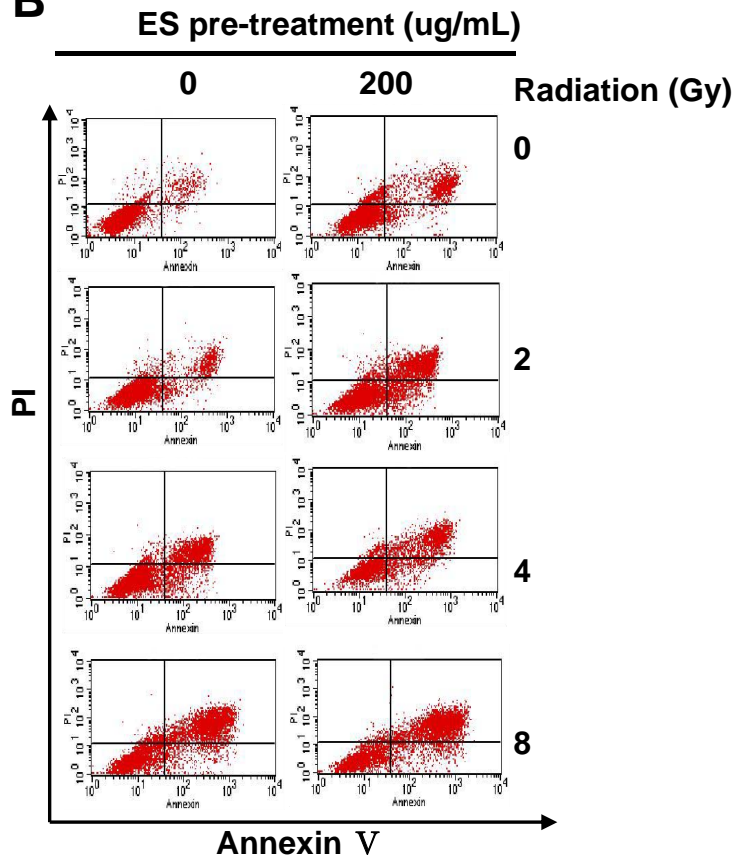

Supplement: MOESM3 [file 9540142]
